# Supplementary material for: Defect modulation of MIL-53(Fe) by Ce doping for PMS activation on the degradation of tetracycline: singlet oxygen and electron transfer
Source: Royal Society of Chemistry journal article supplement (doi:10.1039/d4nj05258g), 2025-01-01
Supplement: d4nj05258g1.pdf [file d4nj05258g1.pdf]

## Supporting Data

### Defect modulation of MIL-53(Fe) by Ce doping for PMS activation on the degradation of tetracycline: Singlet oxygen and electron transfer

Liwen Tang<sup>a</sup>, Yuxin Huang<sup>a</sup>, Jialiang Lin<sup>a</sup>, Xiaoman Li<sup>a</sup>, Jianhua Cheng<sup>a,b\*</sup>

<sup>a</sup> Guangdong Provincial Key Laboratory of Solid Wastes Pollution Control and Recycling, College of Environment and Energy, South China University of Technology, Guangzhou 510006, China

<sup>b</sup> South China Institute of Collaborative Innovation, Dongguan 523808, China

#### Test.S1 Chemical and materials

Ferric chloride hexahydrate ( $\text{FeCl}_3 \cdot 6\text{H}_2\text{O}$ ), cerous nitrate ( $\text{Ce}(\text{NO}_3)_3 \cdot 6\text{H}_2\text{O}$ ), terephthalic acid ( $\text{H}_2\text{BDC}$ ,  $\text{C}_8\text{H}_6\text{O}_4$ ), *N,N*-dimethylformamide (DMF,  $\text{C}_3\text{H}_7\text{NO}$ ), peroxymonosulfate (PMS,  $\text{KHSO}_5 \cdot 0.5\text{KHSO}_4 \cdot 0.5\text{K}_2\text{SO}_4$ ) and furfuryl alcohol (FFA,  $\text{C}_5\text{H}_6\text{O}_2$ ) were obtained from Aladdin (Shanghai, China). Tetracycline (TC,  $\text{C}_{22}\text{H}_{24}\text{N}_2\text{O}_8 \cdot \text{HCl}$ ), tert-butanol (TBA,  $\text{C}_4\text{H}_9\text{OH}$ ), *p*-Benzoquinone (*p*-BQ,  $\text{C}_6\text{H}_4\text{O}_2$ ) and potassium iodide (KI) were purchased from Macklin (Shanghai, China). Ethyl alcohol ( $\text{C}_2\text{H}_5\text{OH}$ ), methanol ( $\text{CH}_3\text{OH}$ ), salicylic acid ( $\text{C}_7\text{H}_6\text{O}_3$ ), sodium hydroxide (NaOH), and sulfuric acid ( $\text{H}_2\text{SO}_4$ ) were purchased from Guangzhou Chemical Reagent Factory. All chemicals were analytical grade and did not require further purification. Nafion solution (5% wt) was purchased from DuPont Co., Ltd (United States). Ultrapure water with a resistivity of  $18.2 \text{ M}\Omega \cdot \text{cm}$  was used for all experiments.

#### Test.S2 Characterization

The morphology and elemental composition of the electrode surface were observed by scanning electron microscope (SEM, Carl Zeiss Microscopy, GmbH, Germany) and energy dispersive spectrometer (EDS, Carl Zeiss Microscopy, GmbH, Germany). Using  $\text{Cu K}\alpha$  radiation ( $\lambda = 1.5405 \text{ \AA}$ ) in the  $2\theta$  range of  $5\text{--}90^\circ$  at a scan step of  $5^\circ \text{ min}^{-1}$  to study the crystalline phase of MIL-53(Fe) and MIL-53( $\text{Fe}_{1-x}\text{Ce}_x$ ) via powder X-ray diffractometer (XRD, Bruker D8, Germany). Use X-ray photoelectron spectrometer (XPS, Thermo Scientific K-Alpha, United States) to know the surface chemical composition of materials. Fourier transforms infrared (FTIR, Nicolet 5700, United States) spectroscopy can obtain the functional groups and chemical bonds. Raman spectroscopy analysis was carried out using a Horiba LabRAM HR Evolution Raman spectrometer. The BET results of surface areas, pore volume, and pore size were calculated using an ASAP 2460 Micromeritics at 77 K.

#### Test.S3 Analytical methods

The concentrations of TC were analyzed via high-performance liquid chromatography (HPLC, Waters 2695, United States) system equipped with a C18 column ( $4.6 \text{ nm} \times 250 \text{ nm}$ ,  $5 \mu\text{m}$ , Agilent) and a UV-Vis detector. A solution of iodide (KI, 0.5 M) with bicarbonate buffer ( $\text{NaHCO}_3$ , 0.05 M) was prepared to determine the PMS

concentration, then mixed 0.1 mL filtered sample into the above solution (4.9 mL). After 20 min complete reaction, the chromogenic sample was detected at  $\lambda = 352 \text{ nm}^1$ . A UV-Vis spectrophotometer (HACH DR 5000, United States) equipped with quartz cuvettes of 1 cm light path was used for the absorption measurements. The point of zero electric charges (pHpzc) was determined by a Zetasizer Nano analyzer (ZetaPALS, Malvern, UK). The concentrations of dissolved iron were measured by inductively coupled plasma-mass spectrometry (ICP-MS, PerkinElmer NexION 300X, USA). Electron paramagnetic resonance (EPR, Bruker A300, Germany) spectroscopy was used for in situ detection of ROS using 5,5-dimethyl-1-pyrroline-N-oxide (DMPO) and 2,2,6,6-tetramethyl-4-piperidinol (TEMP) as the spin-trapping agent. TC degradation intermediates were studied using an Agilent 1290 ultrahigh performance liquid chromatography-mass spectrometry system (UHPLC-MS, Bruker maXis impact, German) with a Zorbax Rx-C18 column. Gradient elution was employed, with eluent A comprising 0.1% formic acid and eluent B consisting of acetonitrile.

Open circuit potential-time (OCPT) were carried out on a three-electrode cell system in 0.1 mM  $\text{Na}_2\text{SO}_4$  electrolyte solution by the electrochemical workstation (Chenhua Instruments CHI 760E, China). The working electrode was prepared by the commercial glassy carbon electrode (GCE).  $5 \text{ g}\cdot\text{L}^{-1}$  catalysts (MIL-53 or MIL-53( $\text{Fe}_{1-x}\text{Ce}_x$ )) were added into a methanol solution containing 5% Nafion and then dispersed ultrasonically for 30 min. 9  $\mu\text{L}$  slurry was dropped on the surface of the GCE by pipette. Hg/Hg<sub>2</sub>SO<sub>4</sub> and platinum electrodes work as the reference and counter electrodes.

The biotoxicity of degraded TC solution was evaluated. The biotoxicity of the degraded TC solution was assessed using Escherichia coli (E. coli) as indicator bacteria. The bacteria were first incubated for one day at 37 °C in Luria-Bertani medium (LB broth: tryptone 10 g/L, NaCl 10 g/L, yeast extract g/L, pH 7.4). They were then washed by centrifugation with distilled water at 3000 rpm. The bacteria were then resuspended in sterilised aqueous solution and diluted to  $1 \times 10^4$  CFU/mL. The experimental conditions for the toxicity test were as follows: 0.6 mL of the original TC solution or the post-reaction solution was mixed with 5.4 mL of the bacterial solution and incubated in a thermostatic incubator at 230 rpm for 12 h. Then 0.1 mL of the mixture was homogeneously distributed on an agar plate. The plates were incubated at 37°C for 24 hours.

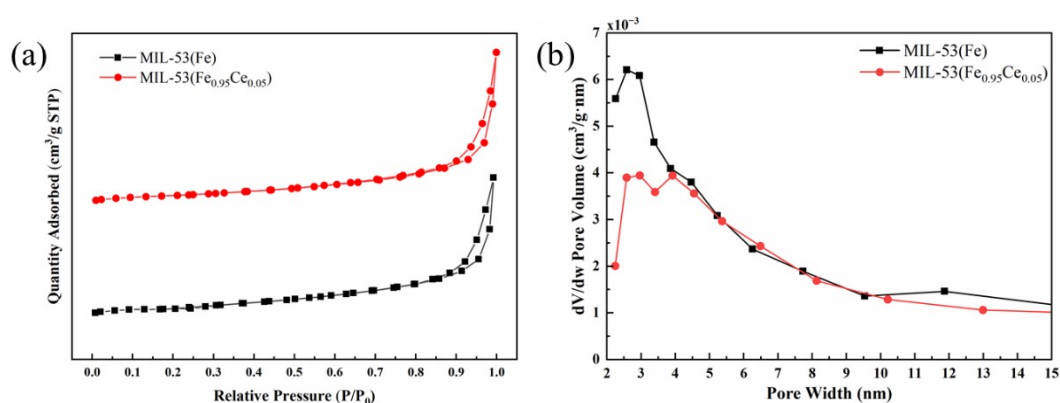

Fig. S1. N<sub>2</sub> adsorption-desorption isotherm (a) and Pore size distribution(b) of MIL-53(Fe) and MIL-53(Fe<sub>0.95</sub>Ce<sub>0.05</sub>).

Table S1 Average pore diameter and total pore volume of catalysts

| Sample                                         | $S_{\text{BET}}$ ( $\text{m}^2\cdot\text{g}^{-1}$ ) | Average pore diameter (nm) | Total pore volume ( $\text{cm}^3\cdot\text{g}^{-1}$ ) |
|------------------------------------------------|-----------------------------------------------------|----------------------------|-------------------------------------------------------|
| MIL-53(Fe)                                     | 19.7792                                             | 19.2707                    | 0.101833                                              |
| MIL-53(Fe <sub>0.95</sub> Ce <sub>0.05</sub> ) | 17.4271                                             | 17.7322                    | 0.0962009                                             |

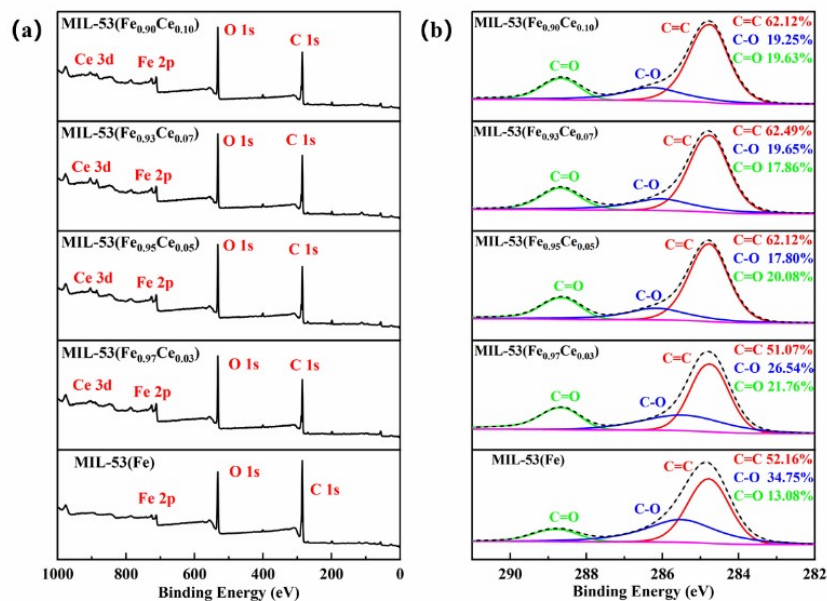

Fig. S2. XPS spectra of MIL-53(Fe) and MIL-53(Fe<sub>1-x</sub>Ce<sub>x</sub>): (a) Survey, (b) C 1s.

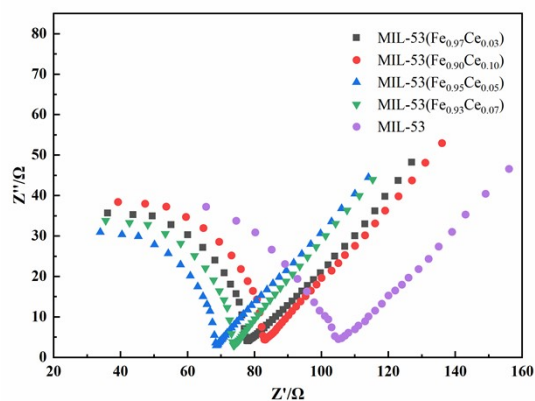

Fig. S3. EIS spectra for MIL-53(Fe) and MIL-53(Fe<sub>1-x</sub>Ce<sub>x</sub>).

Table S2. XPS fitting results for different catalysts.

| Sample                                                 | C 1s   |        |        | O 1s                            |                    |                    | Fe 2p                |                      | Ce 3d                |                      |
|--------------------------------------------------------|--------|--------|--------|---------------------------------|--------------------|--------------------|----------------------|----------------------|----------------------|----------------------|
|                                                        | C=C(%) | C-O(%) | C=O(%) | O <sub>H<sub>2</sub>O</sub> (%) | O <sub>V</sub> (%) | O <sub>L</sub> (%) | Fe <sup>2+</sup> (%) | Fe <sup>3+</sup> (%) | Ce <sup>3+</sup> (%) | Ce <sup>4+</sup> (%) |
| MIL-53                                                 | 52.16  | 34.75  | 13.08  | 34.74                           | 51.75              | 13.51              | 59.34                | 40.66                | —                    | —                    |
| MIL-53(Fe <sub>0.97</sub> Ce <sub>0.03</sub> )         | 51.07  | 26.54  | 21.76  | 23.78                           | 54.37              | 21.85              | 65.47                | 34.53                | 35.96                | 64.04                |
| MIL-53(Fe <sub>0.95</sub> Ce <sub>0.05</sub> )         | 62.12  | 17.80  | 20.08  | 20.46                           | 57.38              | 22.16              | 65.68                | 34.32                | 41.99                | 58.01                |
| MIL-53(Fe <sub>0.93</sub> Ce <sub>0.07</sub> )         | 62.49  | 19.65  | 17.86  | 25.77                           | 59.16              | 15.07              | 65.47                | 34.53                | 37.73                | 62.27                |
| MIL-53(Fe <sub>0.90</sub> Ce <sub>0.10</sub> )         | 62.12  | 19.25  | 19.63  | 17.89                           | 61.37              | 20.74              | 64.66                | 35.34                | 32.30                | 67.70                |
| Used<br>MIL-53(Fe <sub>0.95</sub> Ce <sub>0.05</sub> ) | 63.28  | 11.50  | 25.23  | 29.44                           | 40.41              | 20.15              | 51.48                | 48.52                | 34.94                | 63.06                |

Table S3. Comparison of In2O3/Co3O4 with other catalysts on the degradation of TC.

| Catalysts                                         | C <sub>catalysts</sub> | C <sub>TC</sub> | C <sub>PMS</sub> | Degradation performance | Degradation time | Ref.                |
|---------------------------------------------------|------------------------|-----------------|------------------|-------------------------|------------------|---------------------|
| <b>MIL-53(Fe<sub>0.95</sub>Ce<sub>0.05</sub>)</b> | <b>0.1 g/L</b>         | <b>20 mg/L</b>  | <b>0.1 mM</b>    | <b>94%</b>              | <b>7 min</b>     | <b>Present work</b> |
| Mn-MIL-53(Fe)-0.3                                 | 0.2 g/L                | 30 mg/L         | 0.3 g/L          | 93.2%                   | 60 min           | 2                   |
| MIL-53(Fe)@AC                                     | 0.2 g/L                | 20 mg/L         | 2.0 g/L          | 92.14%                  | 120 min          | 3                   |
| 25% Co-MIL-53(Al)                                 | 0.2 g/L                | 30 mg/L         | 0.3 g/L          | 94%                     | 120 min          | 4                   |
| ZIF-67@Ce-MOF-600                                 | 0.2 g/L                | 20 mg/L         | 0.5 g/L          | 99.2%                   | 30 min           | 5                   |
| CoCu-MOF                                          | 0.1 g/L                | 20 mg/L         | 3 Mm             | 98.17%                  | 30 min           | 6                   |
| FeCo-MOF                                          | 0.1 g/L                | 20 mg/L         | 0.1 mM           | 91%                     | 5 min            | 7                   |

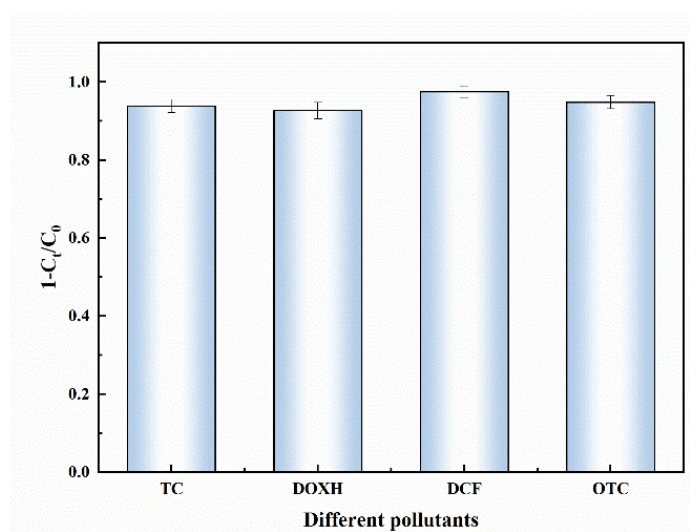

Fig.S4. Degradation of different pollutants by the MIL-53(Fe<sub>0.95</sub>Ce<sub>0.05</sub>)/PMS system

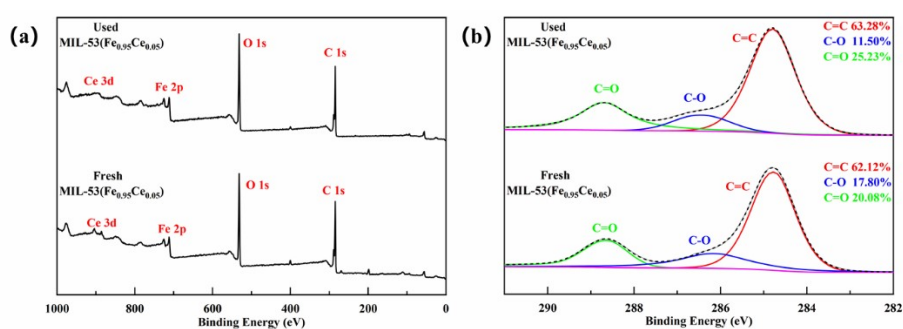

Fig.S5. XPS spectra of MIL-53(Fe<sub>1-x</sub>Ce<sub>x</sub>) before and after reaction (a) Survey, (b) C 1s.

Table S4 The information of the intermediate products for TC degradation via LC/MS

| Compounds | Formula                 | m/z | Proposed structure |
|-----------|-------------------------|-----|--------------------|
| TC        | $C_{22}H_{24}N_2O_8$    | 444 |                    |
| P1        | $C_{20}H_{20}N_2O_8$    | 417 |                    |
| P2        | $C_{20}H_{20}O_6$       | 359 |                    |
| P3        | $C_{22}H_{26}N_2O_{11}$ | 495 |                    |
| P4        | $C_{19}H_{24}O_8$       | 381 |                    |
| P5        | $C_{15}H_{16}O_3$       | 245 |                    |
| P6        | $C_{19}H_{21}NO_9$      | 407 |                    |
| P7        | $C_{10}H_{18}O_5$       | 218 |                    |
| P8        | $C_9H_{16}O_2$          | 157 |                    |
| P9        | $C_{15}H_{14}O_6$       | 291 |                    |

P10  $C_8H_{14}O_2$

143

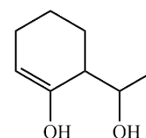

P11  $C_6H_{10}O_2$

114

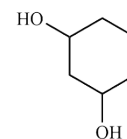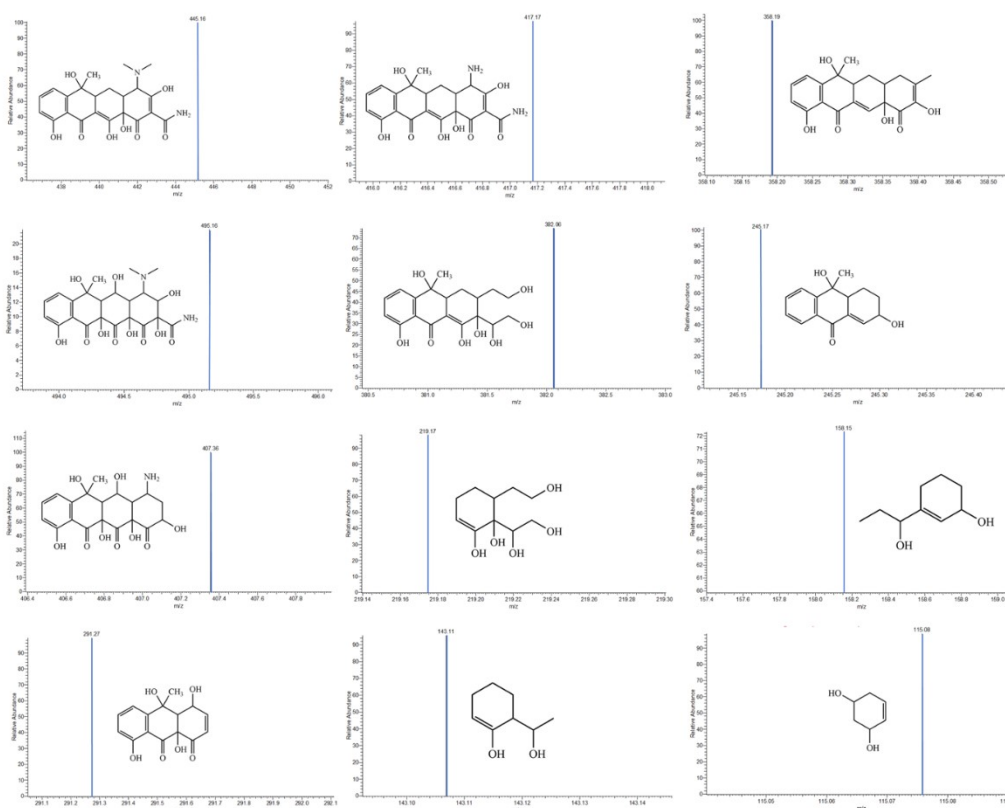

Fig.S6. LC/MS spectral fragments of TC and its intermediates

#### Reference :

1. Y. Xiao, J. Hu, X.-y. Li, Y. Zou, Y. Li, L. Lin and B. Li, *Chemical Engineering Journal*, 2023, **474**, 145973.
2. J. Yu, J. Cao, Z. Yang, W. Xiong, Z. Xu, P. Song, M. Jia, S. Sun, Y. Zhang and J. Zhu, *Journal of Colloid and Interface Science*, 2020, **580**, 470-479.
3. L. Li, J. Han, L. Huang, L. Liu, S. Qiu, J. Ding, X. Liu and J. Zhang, *Surfaces and Interfaces*, 2024, DOI: 10.1016/j.surfin.2024.104521.
4. F. Liu, J. Cao, Z. Yang, W. Xiong, Z. Xu, P. Song, M. Jia, S. Sun, Y. Zhang and X. Zhong, *Journal of Colloid and Interface Science*, 2020, DOI: 10.1016/j.jcis.2020.07.100.
5. F. Hu, S. Ning, Z. Li, H. Zhu, T. Fujita, X. Yin, L. Chen, D. Zeng, M. F. Hamza, Y. Wei and X. Wang,

*Chemosphere*, 2024, DOI: 10.1016/j.chemosphere.2024.142676.

6. Q. Mo, H. Zheng and G. Sheng, *Molecular Catalysis*, 2024, DOI: 10.1016/j.mcat.2023.113817.
7. S. Zhang, Z. Shao and D. Wu, *Arabian Journal of Chemistry*, 2023, DOI: 10.1016/j.arabjc.2023.105483.
